# Supplementary material for: Identification of the Protein Kinases Pyk3 and Phg2 as Regulators of the STATc-Mediated Response to Hyperosmolarity
Source: PubMed Central journal article supplement (PMC3934975; doi:10.1371/journal.pone.0090025), 2014-02-25

Fig. S2

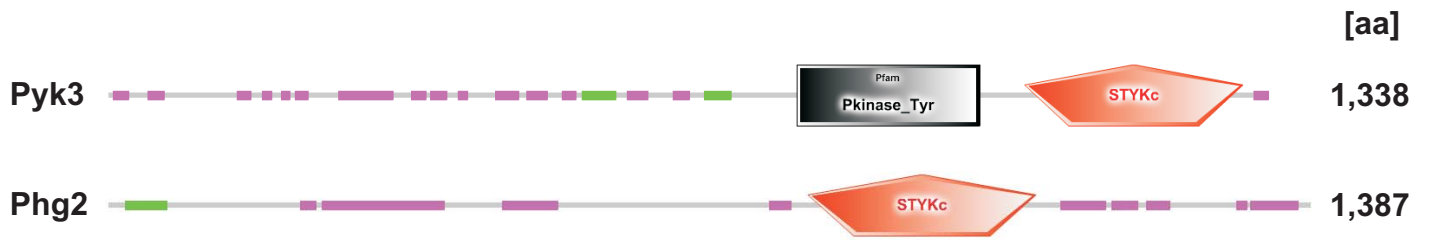

Supplement: pone.0090025.s002.pdf [file pone.0090025.s002.pdf]
